# Supplementary material for: Label-Free Quantitative Proteomic Analysis of Nitrogen Starvation in Arabidopsis Root Reveals New Aspects of H2S Signaling by Protein Persulfidation
Source: MDPI journal article supplement (doi:10.3390/antiox10040508), 2021-03-24
Supplement: s1 [file s1]

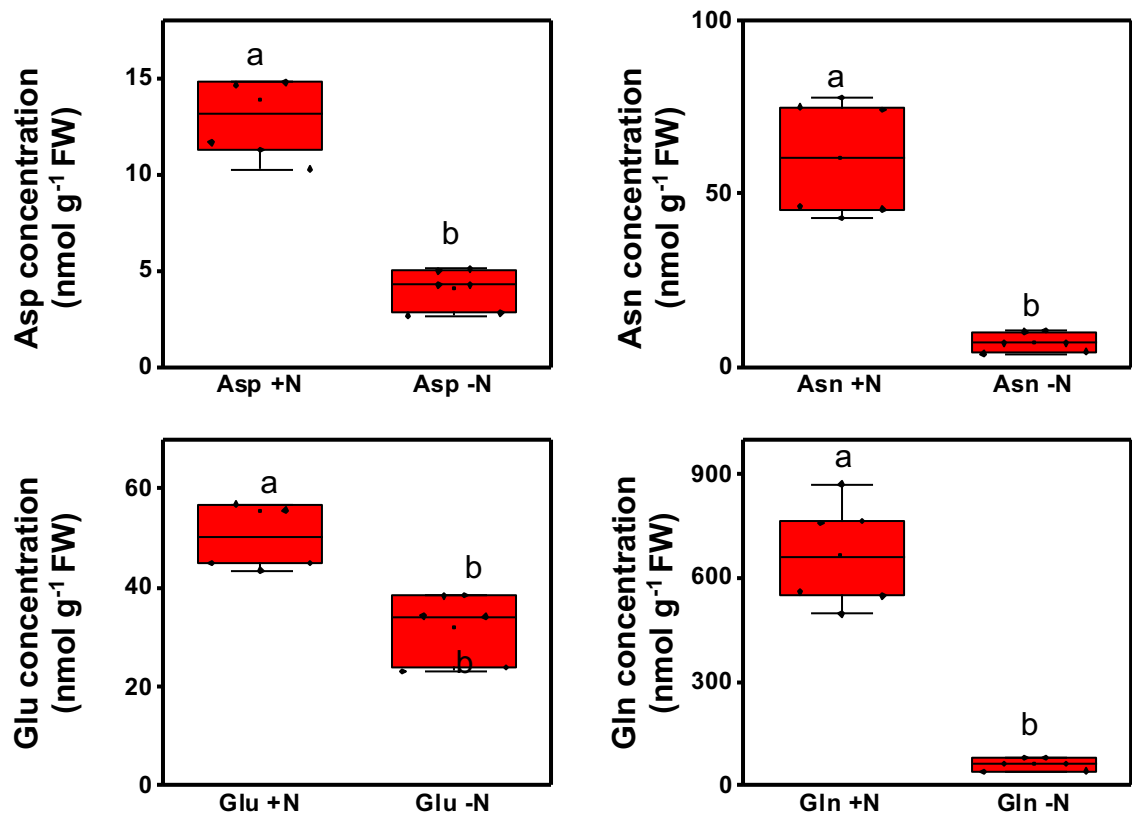

Figure S1. Amino acid determination of Glu, Gln, Asp and Asn in N-sufficient and N-deprived root samples (n = 4). Different letters above the bars indicate significant differences with  $P < 0.01$  (One-way ANOVA, post-hoc Tukey adjustment)
